# Supplementary material for: N-3-Hydroxy Dodecanoyl-DL-homoserine Lactone (OH-dDHL) Triggers Apoptosis of Bone Marrow-Derived Macrophages through the ER- and Mitochondria-Mediated Pathways
Source: MDPI journal article supplement (doi:10.3390/ijms22147565), 2021-07-15
Supplement: s1 [file s1]

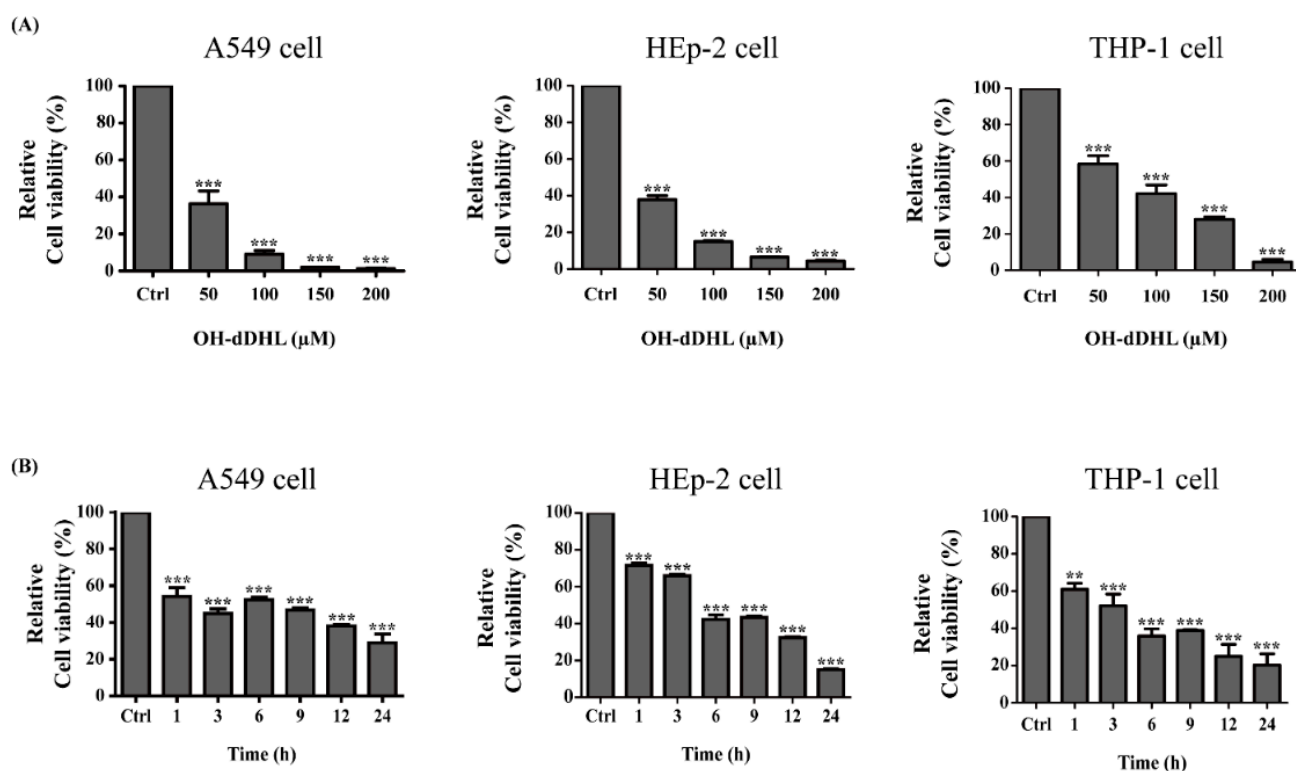

**Figure S1.** OH-dDHL decreases the cell viability of cultured cells. (A) A549, HEp-2, and THP-1 cells were treated with OH-dDHL dose-dependently for 24 h and cell viability was measured by CCK assays. (B) A549, HEp-2, and THP-1 cells were treated with 100  $\mu\text{M}$  OH-dDHL in a time-dependent manner. Data are presented as means  $\pm$  SEM of three independent experiments. \*\*\*,  $p < 0.001$ , \*\*,  $p < 0.01$  vs. control.

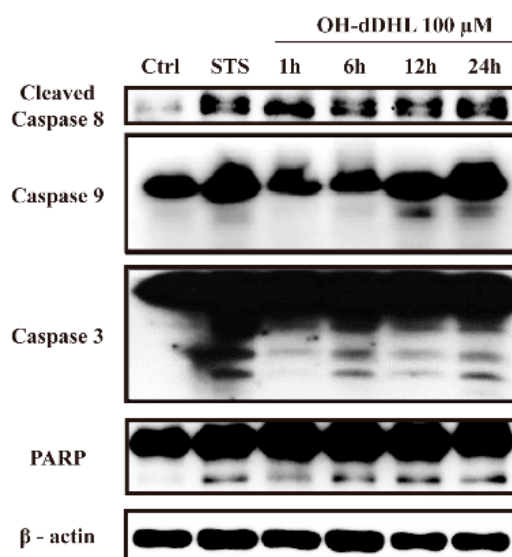

**Figure S2.** OH-dDHL activates of caspase in A549 cells BMDMs were treated in a time-dependent manner. Staurosporine (STS) was used as a positive control. Caspase-8, -9, and -3, and PARP were analyzed by western blot. Ctrl; negative control.

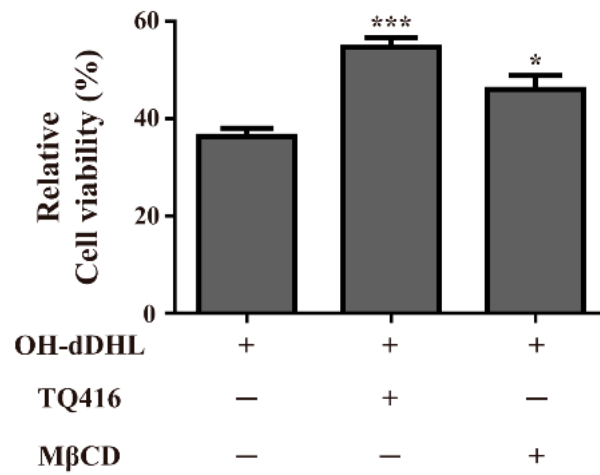

**Figure S3.** Effect of lipid raft and PON2 on the cell viability of A549 cells. Cell viability was determined by CCK assays. MβCD (4 μM) was preapplied for 1 h and TQ416 (4 μM) was simultaneously applied. BMDMs were treated with 100 μM OH-dDHL for 3 h. \*\*,  $p < 0.01$ . \*,  $p < 0.05$  vs. control.

(a)

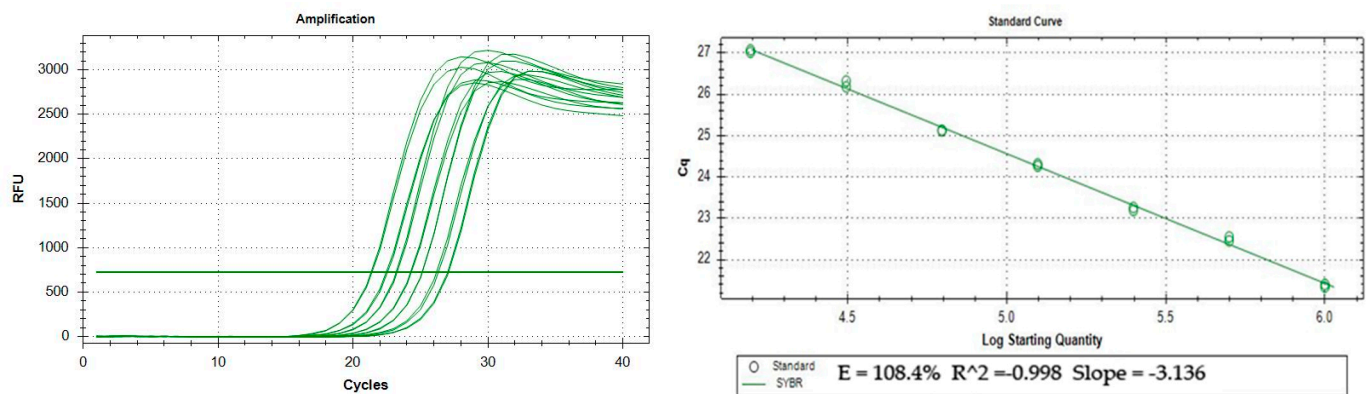

(b)

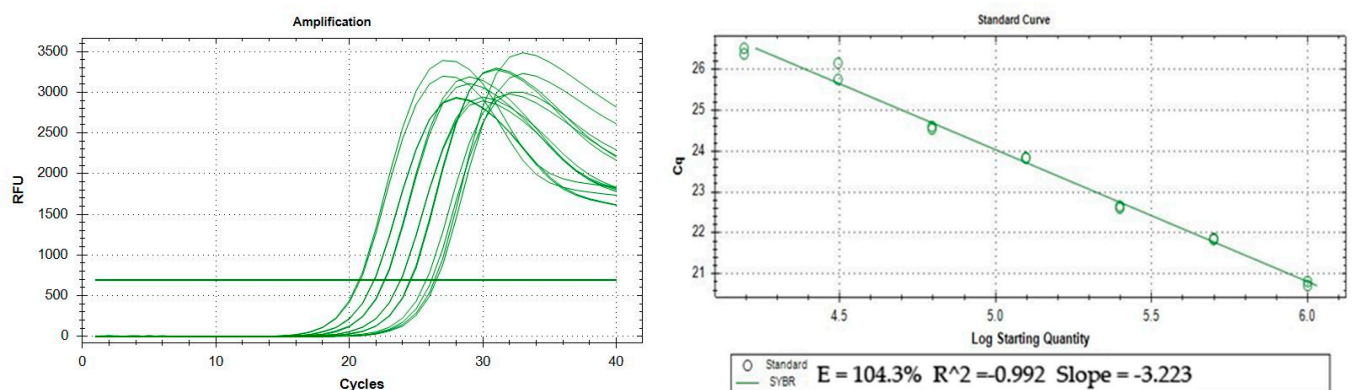

(c)

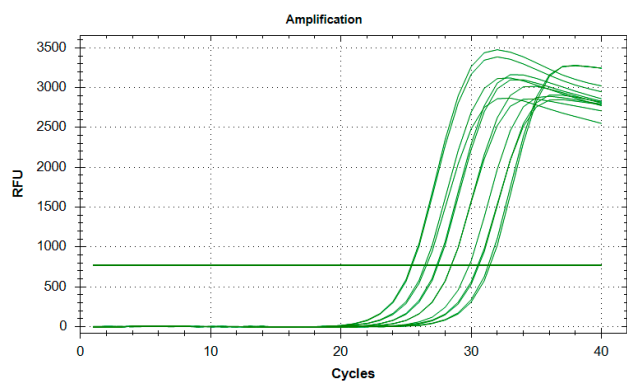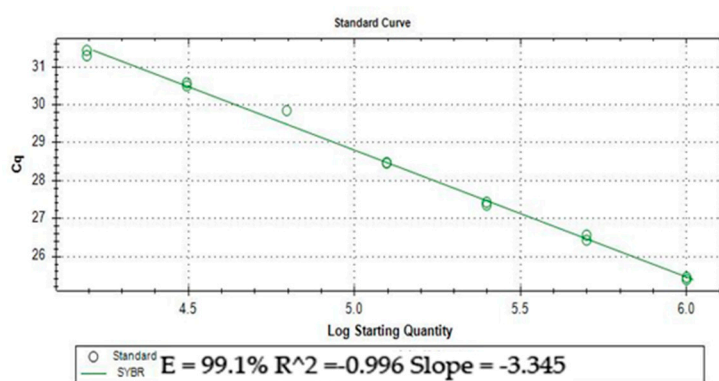

(d)

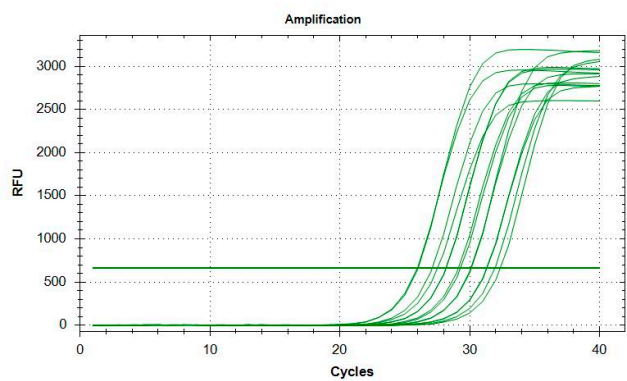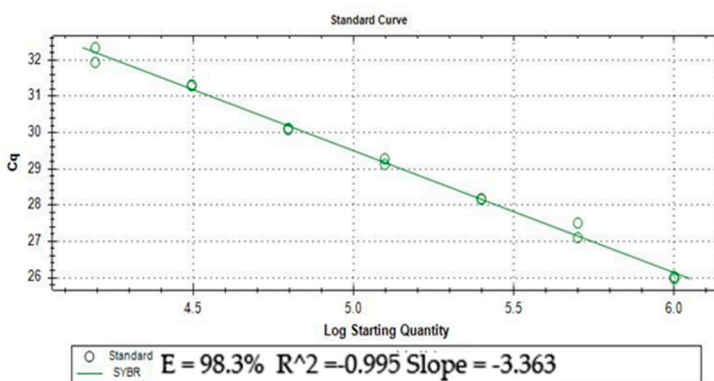

(e)

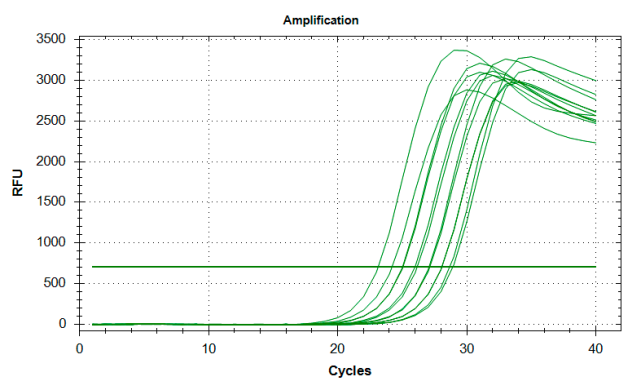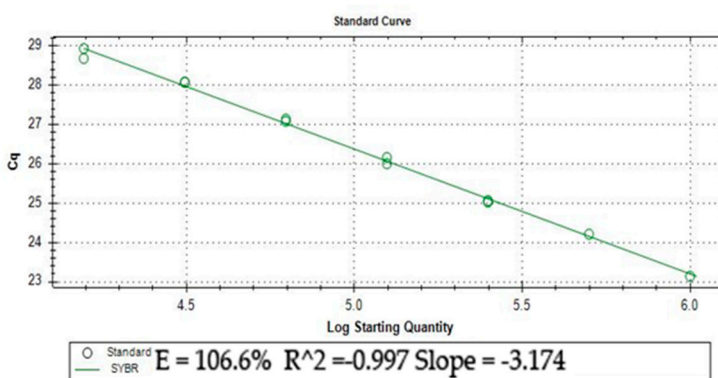

(f)

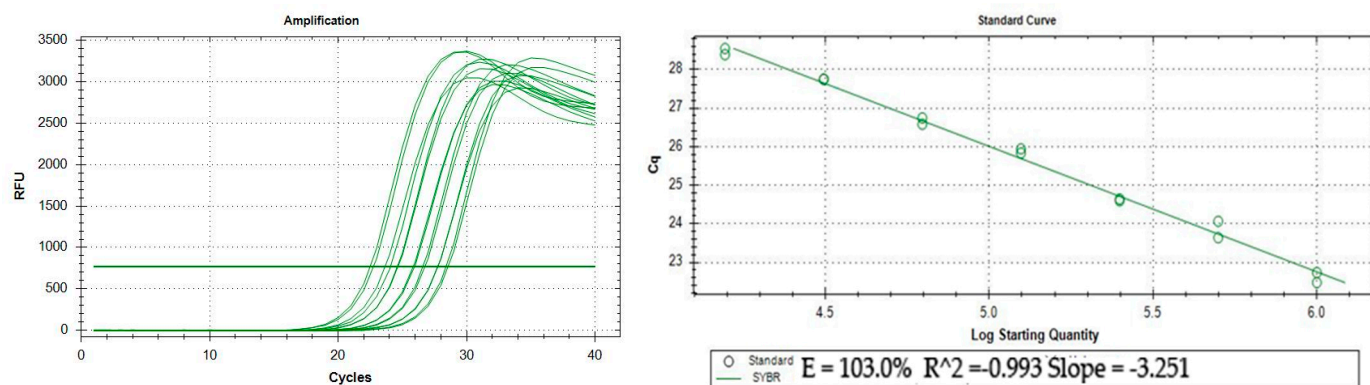

(g)

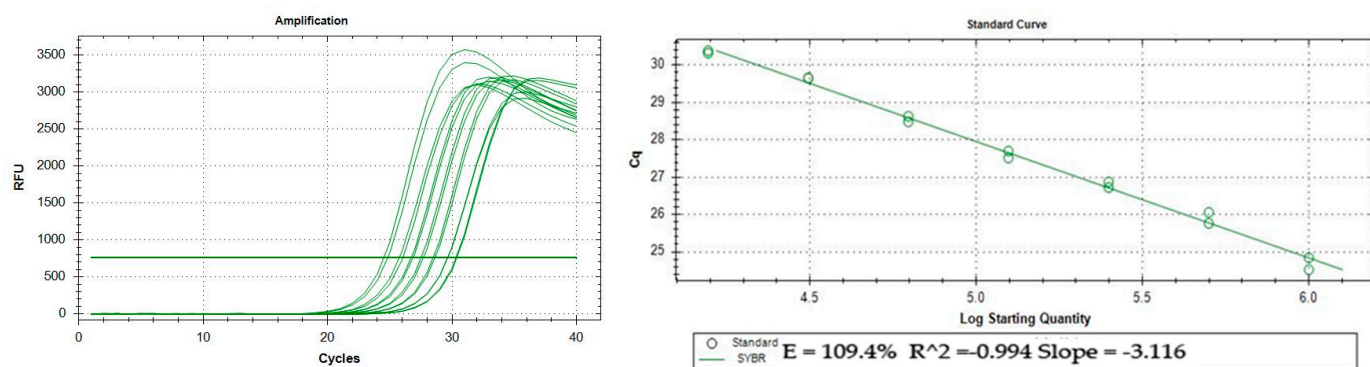

(h)

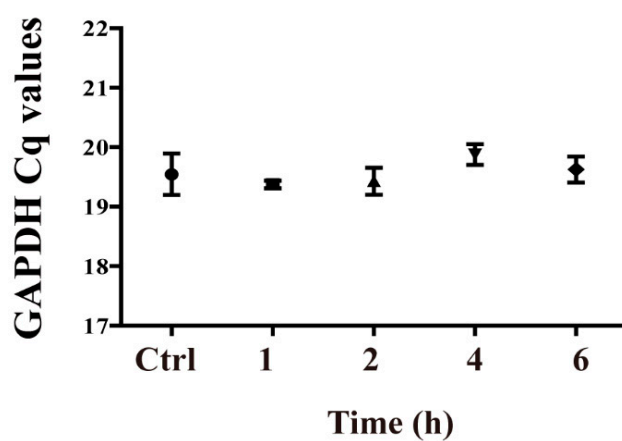

**Figure S4.** The amplification and standard curve of cDNA-based RT-qPCR. The graphs illustrate the efficiency and sensitivity for amplification of genes of interest and reference genes from 2-fold serially diluted cDNA. (a) GAPDH, (b) IL-1 $\beta$ , (c) IL-6, (d) IL-8, (e) MCP-1, (f) TNF- $\alpha$ , (g) PON2. (h) Plot comparison of mean Cq values by 50  $\mu$ M OH-dDHL.

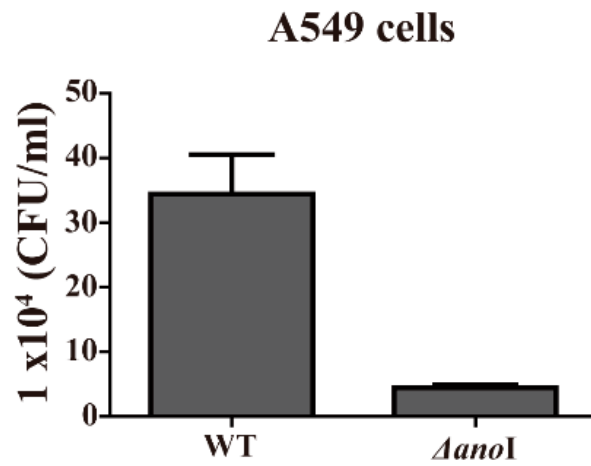

**Figure S5.** Quorum sensing system of  $\Delta anoI$  reduces the ability of invasion in A549 cells. BMDMs were infected with WT and  $\Delta anoI$  at an MOI of 100 for 6 h and incubated for 2 h in complete medium containing gentamicin, followed by additional incubation in complete medium for 16 h.  $\Delta anoI$ . Data are presented as means  $\pm$  SEM of three independent experiments.
